# Supplementary material for: Optimization of Biomass Cultivation from Tuber borchii and Effect of Additives on Triterpenoid Production
Source: MDPI journal article supplement (doi:10.3390/fermentation9080735), 2023-08-06
Supplement: s1 [file s1]

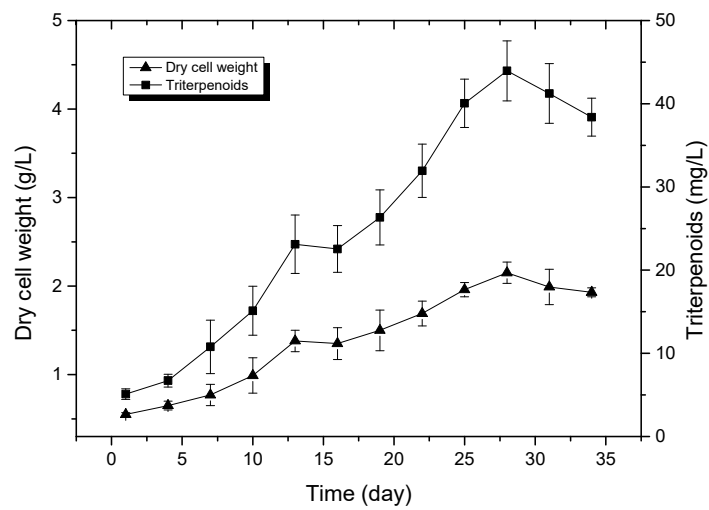

**Figure S1.** Growth curve of *T. borchii* and total triterpenoids production under submerged fermentation.

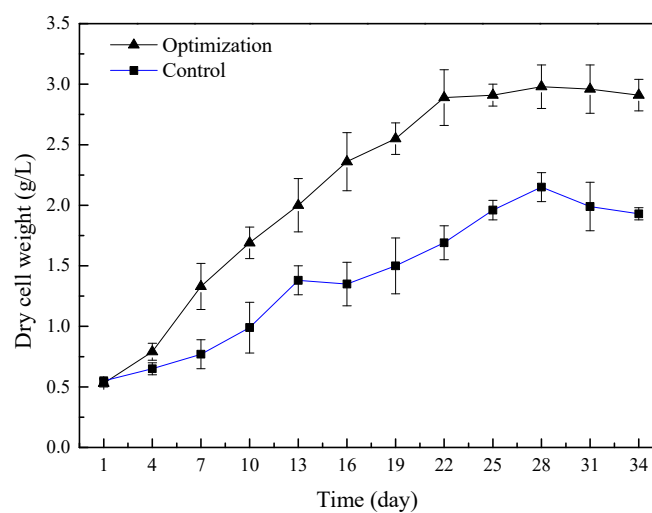

**Figure S2.** Growth curve of *T. borchii* grown in optimized media under submerged fermentation.
